# Supplementary material
Source: PubMed Central journal article supplement (PMC3262673)
Supplement: NIHMS346779-supplement-01.pdf [file NIHMS346779-supplement-01.pdf]

Table I. Taqman primer probe sets

|                           |                                                  |
|---------------------------|--------------------------------------------------|
| <i>Aldoc</i>              | (Mm01298110_g1)                                  |
| <i>Arnt</i>               | (Mm00507836_m1)                                  |
| <i>Bhlhe40</i>            | (Mm00478593_m1)                                  |
| <i>Car4</i>               | (Mm00483021_m1)                                  |
| <i>Car9</i>               | (Mm00519870_m1)                                  |
| <i>Ccl21a</i>             | (Mm03646971_gH)                                  |
| <i>Cdkn1a</i>             | (Mm00432448_m1)                                  |
| <i>Cdkn1b</i>             | (Mm00438168_m1)                                  |
| <i>Cox4i2</i>             | (Mm00438289_g1)                                  |
| <i>Epas1</i>              | (Mm00438717_m1)                                  |
| <i>Foxc2</i>              | (Mm00546194_s1)                                  |
| <i>Hey1</i>               | (Mm00468865_m1)                                  |
| <i>Hey2</i>               | (Mm00469280_m1)                                  |
| <i>Heyl</i>               | (Mm00516555_m1)                                  |
| <i>HIF1a</i>              | (Mm00468875_m1)                                  |
| <i>Hif3a(Nepas)</i>       | (Mm00469373_m1)                                  |
| <i>Hk2</i>                | (Mm00443385_m1)                                  |
| <i>Ldha</i>               | (Mm00495282_g1)                                  |
| <i>Lpcat1</i>             | (Mm00628177_m1)                                  |
| <i>Notch1</i>             | (Mm00435245_m1)                                  |
| <i>Notch3</i>             | (Mm03053620_s1)                                  |
| <i>Notch4</i>             | (Mm00440536_g1)                                  |
| <i>Pdk1</i>               | (Mm00554306_m1)                                  |
| <i>Pdpm</i>               | (Mm00494716_m1)                                  |
| <i>Pgk1</i>               | (Mm00435617_m1)                                  |
| <i>Prox1</i>              | (Mm00435969_m1)                                  |
| <i>Serpine1</i>           | (Mm00435860_m1)                                  |
| <i>Sftpb</i>              | (Mm00455681_m1)                                  |
| <i>Sftpc</i>              | (Mm00488144_m1)                                  |
| <i>Slc2a1</i>             | (Mm01192270_m1)                                  |
| <i>Slc2a3</i>             | (Mm03053806_s1)                                  |
| <i>Sox17</i>              | (Mm00488369_s1)                                  |
| <i>Sox18</i>              | (Mm00656049_gH)                                  |
| <i>Vegfa</i> all isoforms | (Mm00437304_m1)                                  |
| <i>Vegfa120</i>           | (custom ordered – probe spans exon 5/8 junction) |
| <i>Vegfa164</i>           | (custom ordered – probe spans exon 5/7 junction) |
| <i>Vegfa188</i>           | (custom ordered – probe spans exon 6/7 junction) |
| <i>Vegfc</i>              | (Mm01202432_m1)                                  |

**A**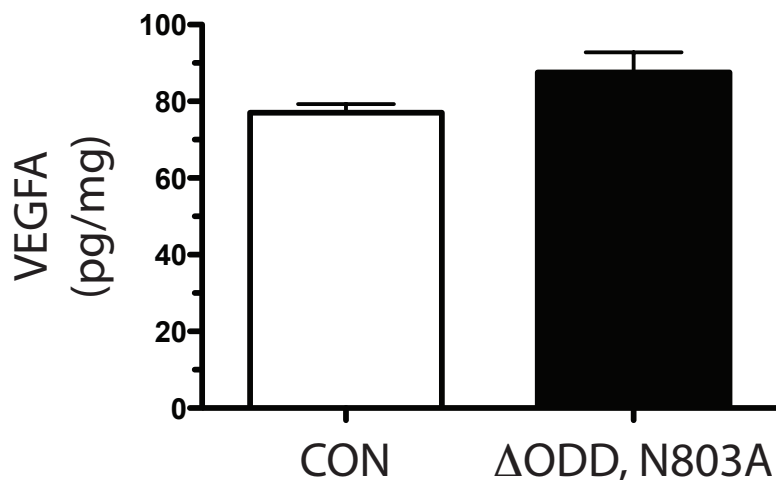**B**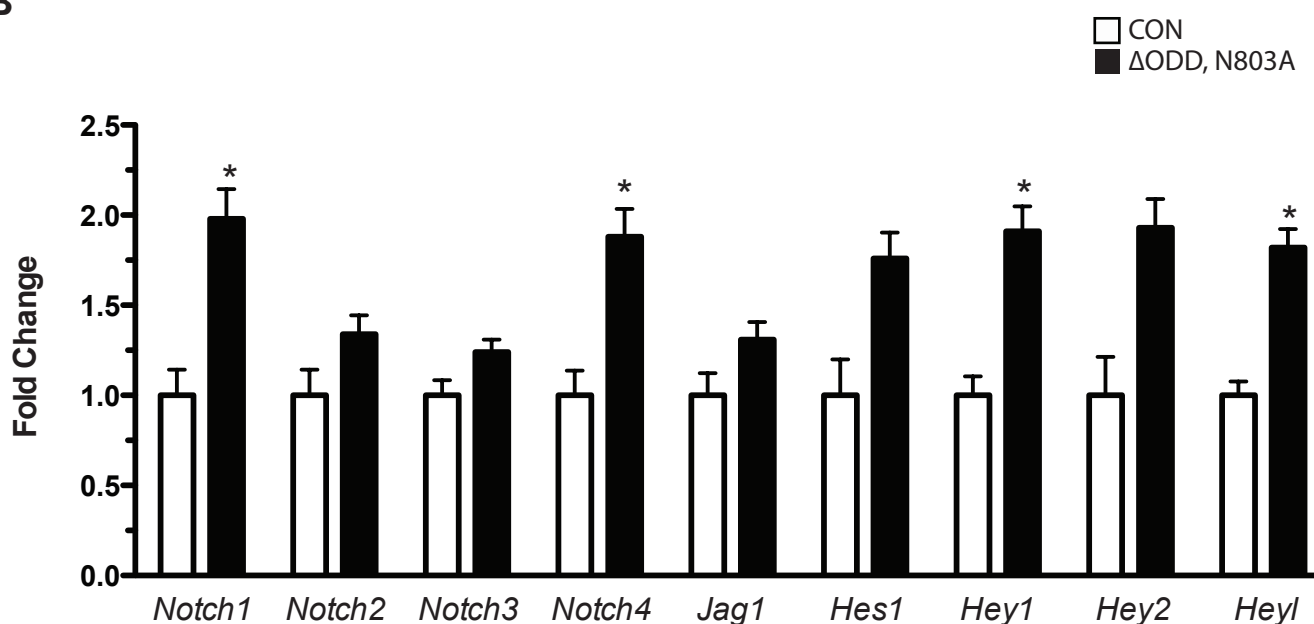

Supplementary Figure 1 – Analysis of VEGFA protein levels and Notch signaling components in HIF1a  $\Delta$ ODD,N803A lungs. A) VEGFA protein levels were not increased in E15.5 HIF1a  $\Delta$ ODD,N803A whole lung homogenates compared to CON animals. n=4-6 samples per genotype. \* $p < 0.05$  vs. CON. B) qPCR analyses demonstrates increased expression of distinct Notch signaling pathway genes in HIF1a  $\Delta$ ODD,N803A lungs. n=5 samples per genotype. \* $p < 0.05$  vs. CON.

A

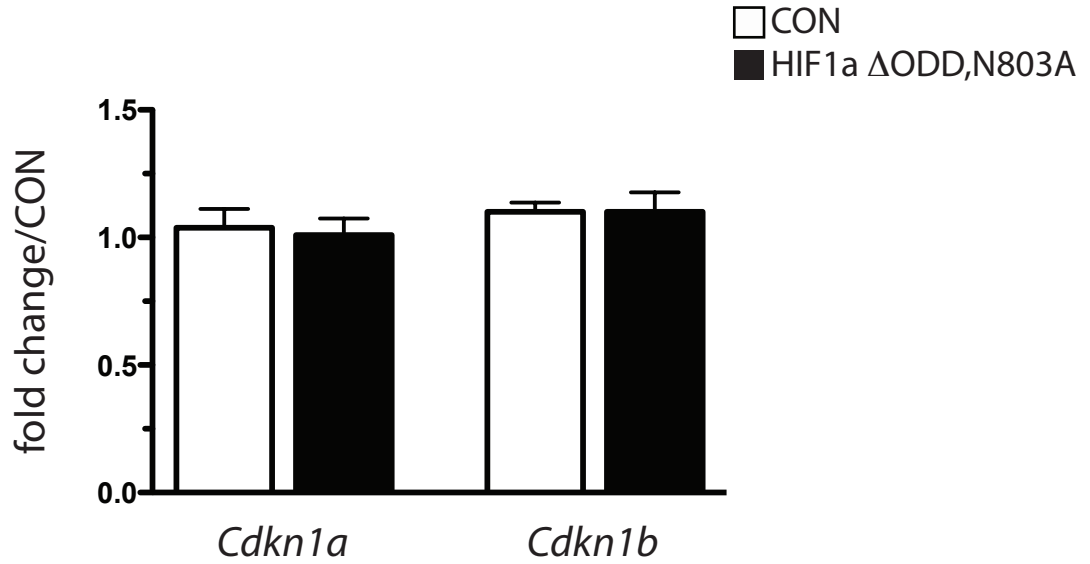

Supplementary Figure 2 – Analysis of Cdkn1a and Cdkn1b mRNA levels in HIF1a  $\Delta$ ODD,N803A lungs. A) qPCR analyses demonstrates similar levels of Cdkn1a and Cdkn1b mRNA in HIF1a  $\Delta$ ODD,N803A and littermate control lungs at E14.5. n=4-6 samples per genotype.
